# Supplementary material for: Wishes and needs of community-dwelling older persons concerning general practice: A qualitative study
Source: PubMed Central journal article supplement (PMC6049904; doi:10.1371/journal.pone.0200614), 2018-07-17
Supplement: pone.0200614.s001.pdf [file pone.0200614.s001.pdf]

## S1 File. Interview guide (focus groups and individual interviews)

| Topics                                                                                                                 | Timetable | Cumulative |
|------------------------------------------------------------------------------------------------------------------------|-----------|------------|
| 1. Introduction                                                                                                        | 10 min    | 10 min     |
| a. Introduction researchers                                                                                            |           |            |
| b. Recording the interview                                                                                             |           |            |
| c. Confidentiality                                                                                                     |           |            |
| d. Aim of interview                                                                                                    |           |            |
| e. Conversationrules                                                                                                   |           |            |
| f. Duration and break                                                                                                  |           |            |
| 2. Introduction of participants                                                                                        | 10 min    | 20 min     |
| a. Who are you? Where do you live?                                                                                     |           |            |
| b. What comes to your mind at first on this topic?                                                                     |           |            |
| c. Vitality of yourself and other older persons                                                                        |           |            |
| 3. Mapping hindering complaints                                                                                        | 10 min    | 30 min     |
| a. Which complaint(s) hinder you from day to day?                                                                      |           |            |
| b. Why are these complaints important for you?                                                                         |           |            |
| c. What is their impact on your daily activities?                                                                      |           |            |
| NB. Focus on pain and problems with standing/walking                                                                   |           |            |
| 4. Care needs and wishes                                                                                               | 25 min    | 55 min     |
| a. What care needs and wishes do you have concerning these hindering health complaints?                                |           |            |
| b. Who can/should help with these needs and wishes?                                                                    |           |            |
| c. What do you consider important concerning these persons and/or organisations?                                       |           |            |
| COFFEEBREAK                                                                                                            | 15 min    | 70 min     |
| 5. Role of the GP and general practice                                                                                 | 40 min    | 110 min    |
| a. Why did you or did you not visit your GP/general practice with these hindering health complaints?                   |           |            |
| b. What do you expect from your GP/general practice concerning these complaints?                                       |           |            |
| NB. Focus on pain and problems with standing/walking                                                                   |           |            |
| 6. To conclude                                                                                                         | 10 min    | 120 min    |
| a. Thank participants                                                                                                  |           |            |
| b. Explanation of what will happen with the audiofiles                                                                 |           |            |
| NB. Give present, fill in forms for travel expenses supply parking tickets. Help participant to own transport or taxi. |           |            |
