# Supplementary material for: Wishes and needs of community-dwelling older persons concerning general practice: A qualitative study
Source: PubMed Central journal article supplement (PMC6049904; doi:10.1371/journal.pone.0200614), 2018-07-17

## S2. Flowchart of the study

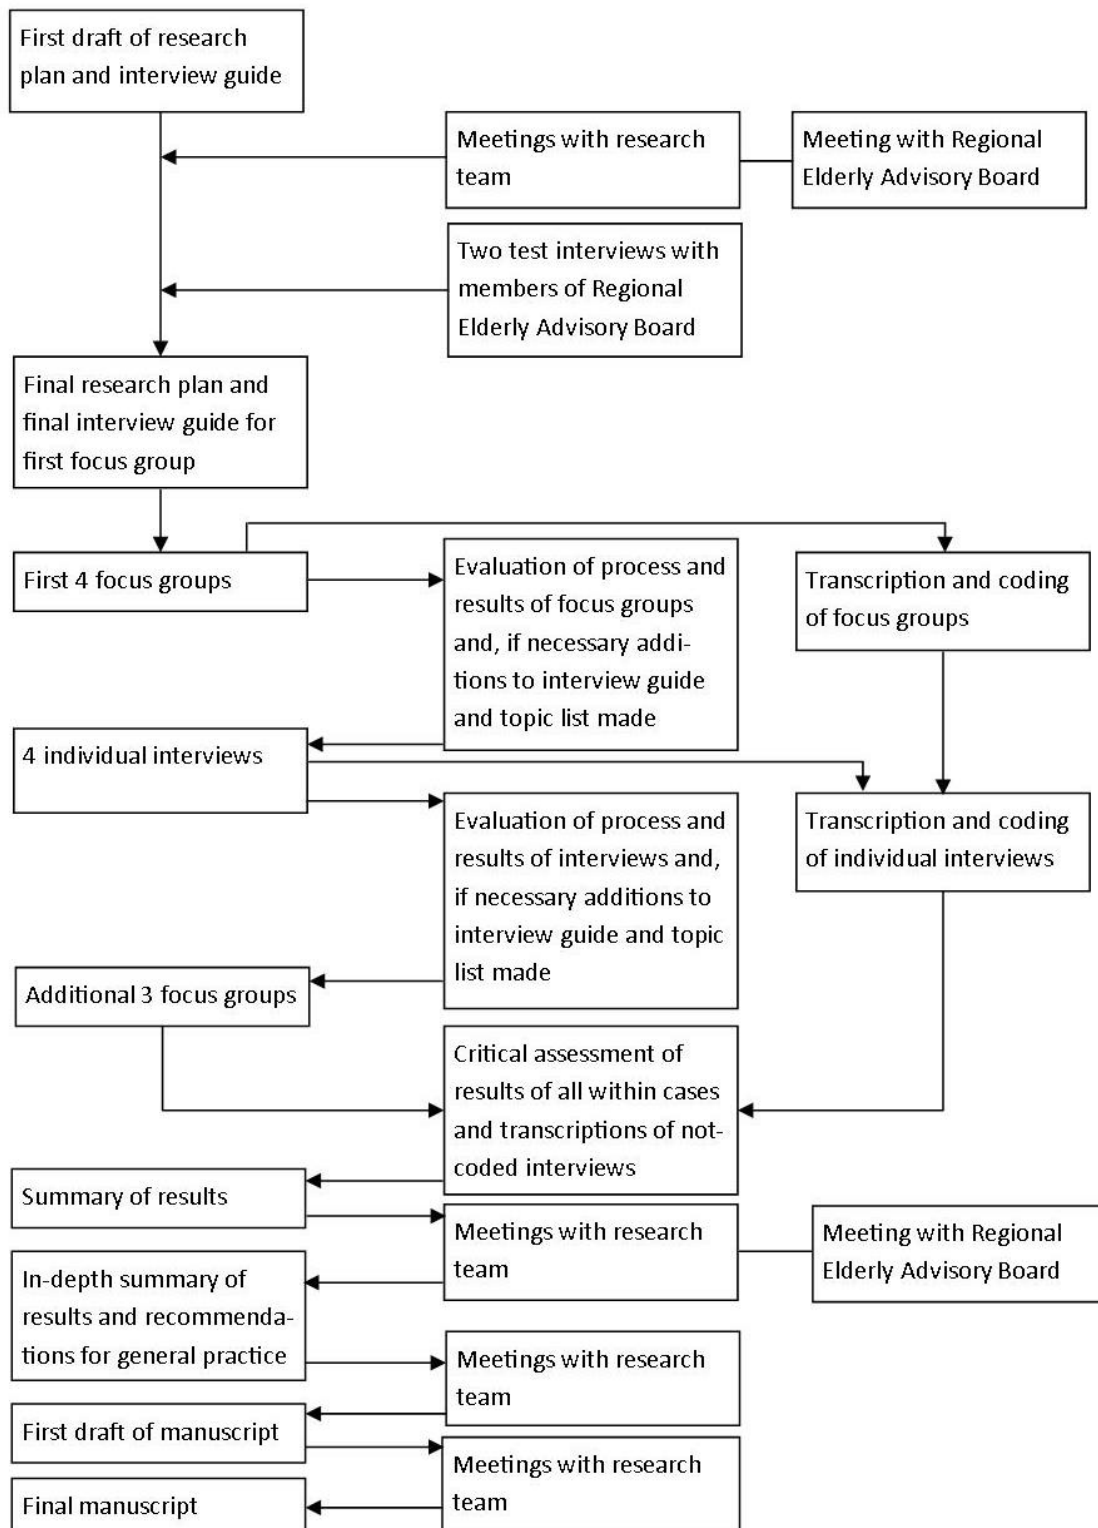

Supplement: pone.0200614.s002.pdf [file pone.0200614.s002.pdf]
