# Supplementary material for: Wishes and needs of community-dwelling older persons concerning general practice: A qualitative study
Source: PubMed Central journal article supplement (PMC6049904; doi:10.1371/journal.pone.0200614), 2018-07-17
Supplement: pone.0200614.s003.pdf [file pone.0200614.s003.pdf]

### S3. Characteristics of participants per (group)interview

| Participant | Age  | Sex | Marital status  | Living situation         | Multimorbidity | Polypharmacy | ISCOPE score | Pain | Problems with walking/standing | Other complaints |
|-------------|------|-----|-----------------|--------------------------|----------------|--------------|--------------|------|--------------------------------|------------------|
| 1.1         | 83.1 | F   | Maried          | Independent, with others | Yes            | Yes          | 3            | No   | Yes                            | Yes              |
| 1.2         | 86.3 | M   | Maried          | Independent, with others | Yes            | Yes          | 3            | Yes  | No                             | No               |
| 1.3         | 86.4 | M   | Maried          | Independent, with others | No             | No           | 0            | No   | Yes                            | Yes              |
| 2.4         | 85.8 | F   | Divorced        | Home for the elderly     | Yes            | Yes          | 4            | Yes  | Yes                            | Yes              |
| 2.5         | 91.1 | F   | Widowed         | Independent, alone       | Yes            | Yes          | 3            | Yes  | Yes                            | Yes              |
| 3.6         | 81.7 | F   | Widowed         | Independent, alone       | Yes            | Yes          | 0            | Yes  | No                             | Yes              |
| 3.7         | 81.2 | F   | Maried          | Independent, with others | Yes            | Yes          | 1            | Yes  | Yes                            | Yes              |
| 3.8         | 87.9 | F   | Widowed         | Independent, alone       | No             | No           | 1            | Yes  | Yes                            | No               |
| 4.9         | 92.5 | F   | Widowed         | Independent, alone       | Yes            | Yes          | 4            | No   | Yes                            | Yes              |
| 4.10        | 82.8 | F   | Maried          | Independent, with others | Yes            | Yes          | 4            | Yes  | Yes                            | Yes              |
| 4.11        | 90.0 | F   | Widowed         | Independent, alone       | Yes            | Yes          | 3            | Yes  | Yes                            | Yes              |
| 5.12        | 98.7 | F   | Widowed         | Independent, alone       | No             | No           | 0            | No   | Yes                            | No               |
| 5.13        | 92.2 | F   | Divorced        | Home for the elderly     | Yes            | No           | 4            | Yes  | Yes                            | No               |
| 6.14        | 83.8 | M   | Living together | Independent, with others | Yes            | Yes          | 2            | Yes  | Yes                            | Yes              |
| 6.15        | 83.6 | M   | Widowed         | Independent, alone       | Yes            | Yes          | 3            | No   | Yes                            | Yes              |
| 6.16        | 89.4 | M   | Widowed         | Independent, alone       | Yes            | Yes          | 4            | No   | Yes                            | No               |
| 6.17        | 90.6 | F   | Maried          | Independent, with others | No             | No           | 4            | Yes  | Yes                            | No               |
| 6.18        | 83.7 | F   | Widowed         | Independent, alone       | Yes            | Yes          | 3            | Yes  | No                             | Yes              |
| 7.19        | 83.5 | F   | Widowed         | Independent, alone       | Yes            | No           | 2            | Yes  | No                             | No               |
| 7.20        | 85.2 | F   | Widowed         | Independent, alone       | Yes            | Yes          | 4            | Yes  | Yes                            | Yes              |
| 8.21        | 85.7 | M   | Widowed         | Independent, alone       | No             | Yes          | 2            | No   | Yes                            | No               |
| 9.22        | 84.8 | F   | Widowed         | Independent, alone       | Yes            | No           | 4            | Yes  | Yes                            | Yes              |
| 10.23       | 81.5 | F   | Maried          | Independent, with others | Yes            | Yes          | 2            | No   | Yes                            | No               |
| 11.24       | 95.8 | F   | Widowed         | Independent, alone       | Yes            | Yes          | 3            | Yes  | No                             | Yes              |
